1        **DUX4 induces a homogeneous sequence of molecular**  
2        **changes, culminating in the activation of a stem-cell-like**  
3        **transcriptional network and induction of apoptosis in**  
4        **somatic cells**

5        Ator Ashoti<sup>1</sup>, Anna Alemany<sup>2</sup>, Fanny Sage<sup>2</sup> and Niels Geijsen<sup>2\*</sup>

6

7        <sup>1</sup>Hubrecht Institute, Developmental Biology and Stem Cell Research,  
8        Utrecht, Netherlands

9        <sup>2</sup>Leiden University Medical Center, Leiden, The Netherlands

10        \*Correspondence: [n.geijsen@lumc.nl](mailto:n.geijsen@lumc.nl)

11

## 12 **Abstract**

13 Facioscapulohumeral muscular dystrophy (FSHD) is a muscle degenerative disease  
14 that disproportionally affects the muscles of the face, shoulder girdle and upper arms.  
15 FSHD is caused by the misexpression of Double Homeobox 4 (DUX4), a transcription  
16 factor that is normally expressed during early embryonic development. Ectopic  
17 expression of DUX4 in somatic cells is cytotoxic and leads to rapid apoptosis. To  
18 elucidate the mechanism by which DUX4 induces apoptosis, we determined the  
19 temporal transcriptional changes induced by Dux4 at the single-cell level. We  
20 observed that induction of DUX4 expression induces a non-random, consecutive  
21 sequence of transcriptional changes. DUX4 homogenously induces the activation of a  
22 stem cell signature and activates a network of transcription factors that is typically  
23 expressed during early embryogenesis and in pluripotent stem cells. Ultimately, these  
24 transcriptional changes trigger the induction of apoptosis, suggesting that the  
25 induction of this early stemness program is incompatible with a somatic cell program.  
26 Our findings shed new light on the timing and dynamic of DUX4-mediated  
27 transcriptional reprogramming and may help elucidate why the DUX4 stemness  
28 program is required during early embryogenesis, but incompatible with somatic cell  
29 viability.

30

## 31 Introduction

32 Facioscapulohumeral muscular dystrophy (FSHD) is the third most prevalent muscular  
33 dystrophy worldwide<sup>1</sup>. The disease is autosomal dominant, caused by a gain-of-  
34 function event, which leads to the ectopic expression of Double Homeobox 4 (DUX4)<sup>2-  
35 4</sup> in affected skeletal muscle, primarily in the face, shoulders and upper arms. DUX4  
36 is a transcription factor normally expressed during early embryonic development<sup>5,6</sup>, in  
37 the adult testis<sup>7</sup> and in the thymus<sup>8</sup>. It induces the expression of a network of genes  
38 involved in many different cellular processes, including embryonic development<sup>7,9,10</sup>,  
39 RNA processing<sup>9,11,12</sup>, protein homeostasis<sup>12,13</sup>, germline development<sup>7,9,10</sup>, stress  
40 response<sup>12,14</sup>, and cell adhesion and migration<sup>11,15</sup>. Expression of DUX4 is stochastic  
41 and low, yet potent enough to induce apoptosis in muscle tissue<sup>7,11,16,17</sup>. The  
42 mechanism by which DUX4 expression leads to apoptosis downstream of DUX4 is not  
43 yet known.

44 The DUX4 transcription factor is unique to primates and Afrotheria<sup>18,19</sup> and silenced in  
45 most somatic cell types<sup>20</sup>. In FSHD patients DUX4 is stochastically expressed in a  
46 burst-like fashion in only 0.1-0.5% of myonuclei<sup>7,17,21</sup>. These aspects have hampered  
47 our understanding of the dynamic transcriptional changes that are induced by DUX4.  
48 Indeed, in a study of Heuvel et al.<sup>22</sup>, muscle tissue from 4 FSHD patients was analyzed  
49 by single-cell RNA sequencing. Out of the 5133 cells that were collected and analyzed  
50 from these patients, only 23 cells were classified as DUX4-affected. This reinforces  
51 the idea that potential key players might be missed due to the low number of DUX4  
52 affected cells not reaching a critical number needed to detect DUX4-induced  
53 transcriptional changes, and/or due to stringency in the analysis.

54 To study the temporal transcriptional changes that occur upon DUX4 induction, we  
55 generated a transgenic cell line, in which DUX4 expression can be induced through  
56 the addition of doxycycline<sup>23</sup>. These so called DUX4-inducible expression (DIE) cells  
57 allow for precise titration and timing of the DUX4 response. DUX4 induction is robust  
58 in DIE cells, as 99-100% of the induced cells enter apoptosis<sup>23</sup>. Using this line, we  
59 interrogated whether DUX4 induction led to the induction of defined and orderly  
60 molecular changes, or whether it induced a stochastic disruption of gene expression  
61 networks before ultimately triggering apoptosis. In order to address this question, we  
62 performed single-cell RNA sequencing (SCS) on induced DIE cells, as early as 2 hours

63 after DUX4 induction. By mapping the early molecular changes that follow DUX4  
64 activation at high temporal resolution, we demonstrate that DUX4 induction  
65 homogeneously triggers a series of stepwise molecular changes and induces a stem  
66 cell-like transcriptional signature with expression of a network of genes that are  
67 typically expressed during early embryogenesis. Shortly after the induction of this early  
68 embryonic program, the expression of pro-apoptotic genes is detected, suggesting  
69 that disruptions caused by the DUX4-induced transcriptional network are incompatible  
70 with somatic cell viability.

71

## 72 **Results**

### 73 ***Single cell analysis induced DIE cells***

74 We previously demonstrated that the transcriptomic changes induced by DUX4 in DIE  
75 cells are very similar to those reported in FSHD-patient cells and other cellular  
76 models<sup>23</sup>. A robust DUX4 expression profile could be seen after only 4.5 hours of  
77 induction. However, the manner in which DUX4 expression leads to apoptosis, and  
78 what sort of paths are taken is not yet understood. Does DUX4 initiate a defined  
79 sequence of transcriptional events every time, or does it initiate a stochastic response  
80 that causes a disproportional amount of disruption in the cells that will eventually lead  
81 to cell death? To explore this question, we decided to analyze at single-cell resolution  
82 the transcriptional changes that occur shortly after DUX4 induction. Our inducible  
83 system allows us to examine the immediate effect of DUX4 induction, and track the  
84 changes overtime. Due to the robust induction of DUX4, >99% of the DIE cells enter  
85 apoptosis withing 48hours of DUX4 induction (data not shown), these changes can be  
86 tracked at a high resolution. This type of data would be difficult to attain with primary  
87 material, due to the low frequency of DUX4 expression, that occurs in a burst like  
88 fashion in a small subset of myonuclei. Furthermore, this inducible system allowed us  
89 to time the induction of DUX4, creating a clear timeline trajectory, which is not possible  
90 when working with primary material. SCS, will also allow us to detect subtle and  
91 perhaps rare early transcriptional changes in specific cell populations that could  
92 otherwise be drowned out and missed in bulk RNA sequencing. DIE cells were  
93 induced for 2, 3, 4 and 6 hours with doxycycline before sampling and processing for  
94 SCS. By reducing the dimensionality using t-Distributed Stochastic Neighbor  
95 Embedding (t-SNE) mapping, we were able to have a 2-D visualization of the cell  
96 clustering<sup>24,25</sup>. Our results show separate embedding of uninduced cells (0h) and 6h-  
97 induced cells, but mixed populations of the intermediate states (2h, 3h and 4h) (Fig.  
98 1A). The cells do however orientate themselves on the y-axis, from the uninduced  
99 cells at the top, to the maximum of 6h-induced cells at the bottom (Fig. 1B). This is  
100 evident when the expression of known DUX4 target genes were projected onto the t-  
101 SNE map (Fig. 1C). LEUTX, PRAMEF1 and ZSCAN4 are genes that have previously  
102 shown to increase in expression in FSHD models or FSHD-affected muscle

103 cells<sup>9,11,22,26</sup>. This can indeed also be seen in Fig. 1C, where the expression of these  
104 genes is significantly upregulated in 6h-induced cells. This also holds true for genes  
105 that are downregulated upon DUX4 expression, such as ID1<sup>9,22</sup>. Figure 1C also shows  
106 that as DUX4 induction persists, the expression of ID1 decreases significantly.  
107 As the cells are organized on the y-axis, we manually divided the vertical axis of the t-  
108 SNE into 10 clusters of equal size (Fig. 1D). The mean induction state was calculated  
109 for each cluster by considering all cells and their time of induction (Table 1). To avoid  
110 confusion, the mean induction state of each cluster will from here on be referred to as  
111 the experimental induction times used. Clusters 1 and 2 will therefore be referred to  
112 as 0h, 3&4 as 2h, 5&6 as 3h, 7&8 as 4h and 9&10 as 6h. Using this type of clustering,  
113 differential gene expression analysis was performed to identify differentially expressed  
114 genes between the uninduced cell clusters (clusters 1&2) and the induced cell  
115 clusters, as schematically indicated in figure 1D (right).

116 **Figure 1. SCS data of DIE cells analyzed with RaceID. A)** Induced and uninduced DIE single cell  
117 data represented in a t-distributed stochastic neighbour embedding (t-SNE) map. Each point represents  
118 a single cell, with the induction time of the cells indicated by color. **B)** Individual t-SNE maps for each  
119 of the induction time/state. Each sample is indicated in a different color. Induction states are shown  
120 from left to right, starting with the two 0h replicates. A and B annotations indicate the two replicates. **C)**  
121 t-SNE maps highlighting the expression of DUX4 marker genes. The fold change in gene expression is  
122 shown on a  $\log_2$  scale as a linear color scale. **D)** Clustering of the cells in the t-SNE map based on the  
123 y-axis coordinates. Clusters are numbered (1-10) and color-coded. Clusters 1 and 2 contain the most  
124 uninduced DIE cells, and will be used as the control situation for differential gene expression analysis  
125 with the induced clusters (3&4, 5&6, 7&8, and 9&10).

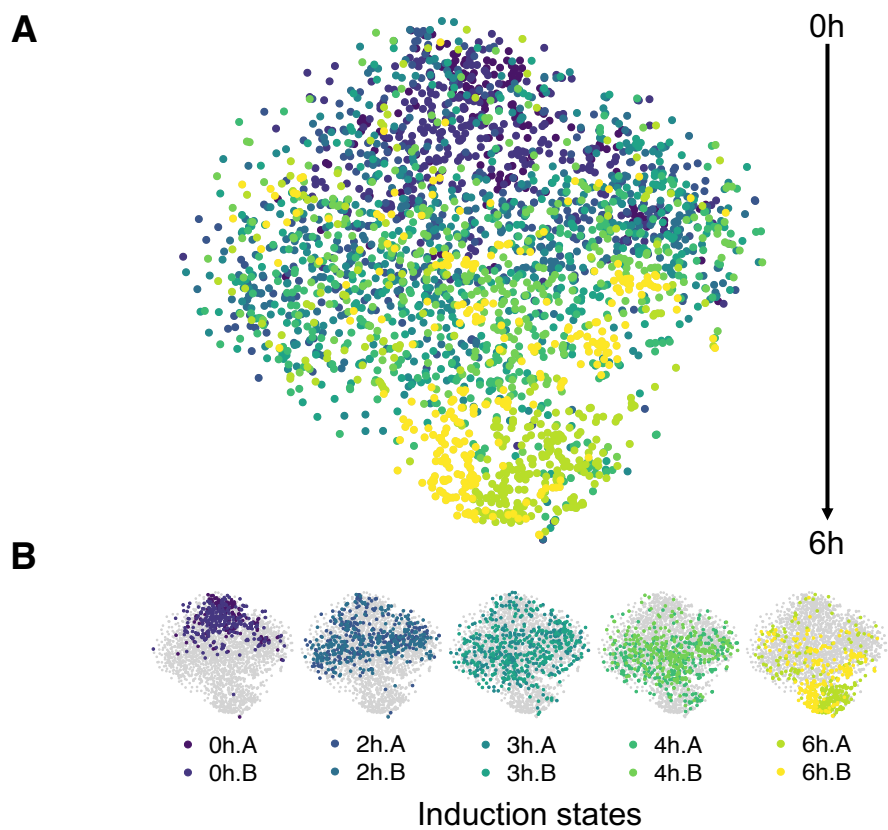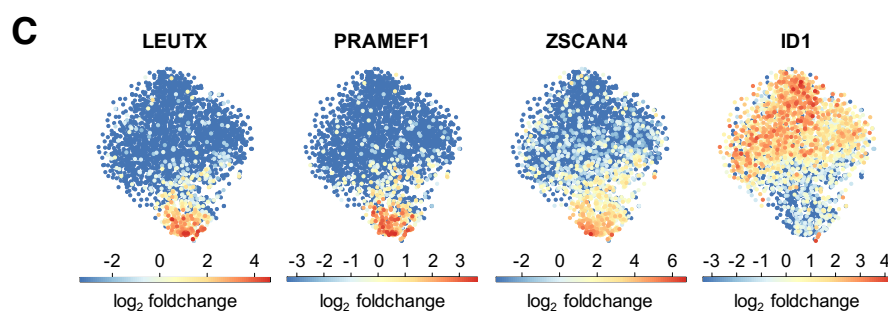

126

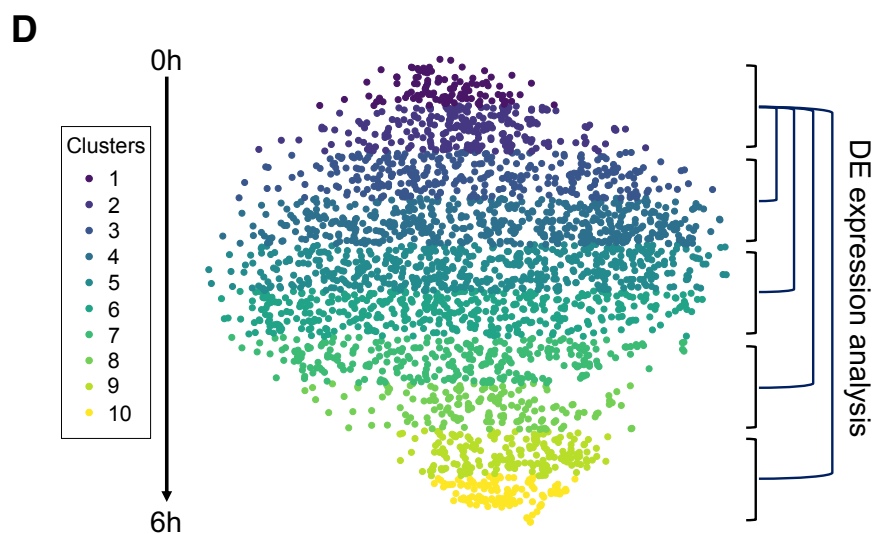

127 **Table 1. Cell make up of t-SNE clusters**

| cluster | 0h.A | 0h.B | 2h.A | 2h.B | 3h.A | 3h.B | 4h.A | 4h.B | 6h.A | 6h.B | cells/<br>cluster | mean<br>state |    |
|---------|------|------|------|------|------|------|------|------|------|------|-------------------|---------------|----|
| cl.1    | 33   | 23   | 15   | 10   | 10   | 5    | 0    | 4    | 5    | 1    | 106               | 1.39          | 0h |
| cl.2    | 61   | 77   | 22   | 17   | 25   | 14   | 7    | 11   | 6    | 1    | 241               | 1.28          |    |
| cl.3    | 38   | 106  | 48   | 29   | 30   | 23   | 9    | 17   | 11   | 1    | 312               | 1.57          | 2h |
| cl.4    | 34   | 57   | 83   | 71   | 69   | 58   | 38   | 49   | 18   | 29   | 506               | 2.61          |    |
| cl.5    | 10   | 20   | 54   | 108  | 58   | 51   | 69   | 90   | 15   | 40   | 515               | 3.14          | 3h |
| cl.6    | 1    | 3    | 33   | 41   | 58   | 65   | 64   | 69   | 23   | 48   | 405               | 3.64          |    |
| cl.7    | 0    | 0    | 12   | 14   | 33   | 41   | 76   | 37   | 31   | 39   | 283               | 4.05          | 4h |
| cl.8    | 0    | 0    | 2    | 1    | 15   | 14   | 20   | 11   | 52   | 42   | 157               | 4.97          |    |
| cl.9    | 0    | 1    | 0    | 0    | 2    | 6    | 25   | 5    | 84   | 61   | 184               | 5.51          | 6h |
| cl.10   | 1    | 0    | 1    | 1    | 1    | 2    | 3    | 1    | 71   | 33   | 114               | 5.73          |    |

128 ***Differential gene expression analysis***

129 In order to detect subtle but significant changes in expression, differentially expressed  
130 genes were filtered for an adjusted p-value (Padj) of  $< 10^{-6}$ , and a  $\log_2(\text{foldchange})$   
131 ( $\log_2\text{FC}$ ) of  $> 0.5$  and  $< -0.5$  (Tables S1-4). This analysis demonstrated that as the  
132 induction time increases, so does the number of differentially expressed genes, with  
133 a core group of differentially expressed genes being shared between induction states,  
134 (Fig. 2A, Table 2 and Tables S1-4). This suggests that a deterministic chain of events  
135 is induced early on, if not immediately after DUX4 expression. Interestingly, even  
136 though DUX4 expression itself was not detected in the induced DIE cells, a DUX4  
137 expression profile is readily detected only 3h post DUX4 induction, as can be seen  
138 when expression data is entered through the Enrichr database<sup>27,28</sup> (Fig. 2B). This  
139 DUX4 profile even becomes more apparent as induction time increases. The Enricher  
140 database can match the entered lists of genes with previously entered studies,  
141 matching our gene lists with one other study from Geng et al.<sup>9</sup> in which DUX4 had  
142 been overexpressed in human primary myoblasts. Such an early induced DUX4  
143 expression profile has (to the best of our knowledge) not been seen before, with other  
144 studies measuring the effects of DUX4 6h<sup>29</sup> or 14h<sup>26</sup> post induction, or 24-36h post  
145 lentiviral transfection<sup>9,26</sup>. As no other study has examined the effects of DUX4 at such



146 early time points, our datasets uniquely show the earliest DUX4 affected genes.  
 147 Furthermore, previously identified DUX4 affected genes such as RFPL4B, GOLGB1,  
 148 ZNF296, SRSF8, ID1 and ID3<sup>9,11,22,26</sup>, could too be classified as potential early marker  
 149 genes, as they have been identified as being differentially expressed after a mere 3h  
 150 of DUX4 induction.

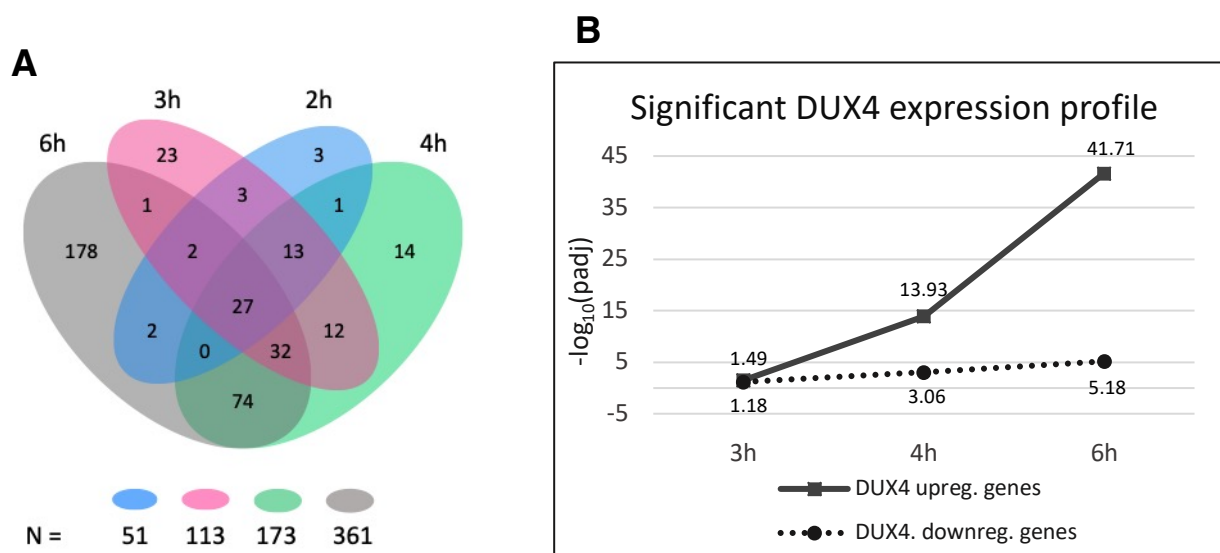

151 **Figure 2. DUX4 differential gene expression profile between induction states. A)** Venn diagram  
 152 demonstrating the number of shared differentially expressed genes between different induction times.  
 153 Total number of differentially expressed genes in each state is shown below the graph, in the same  
 154 color-coding. **B)** A graph demonstrating the increase in significance of the upregulated and  
 155 downregulated expression profile of DUX4 in induced DIE cells, according to entries in the Enrichr  
 156 database. Induction samples are plotted on the x-axis, and the y-axis displays the negative log<sub>10</sub> of the  
 157 adjusted p-value (padj), of the detected DUX4 expression profile.

158 Remarkably, a high percentage (29-36%) of upregulated transcripts encode for  
 159 transcription factors and cofactors, in addition to a number of differentially expressed  
 160 kinases (Table 2, Table S5), which was also observed in previous bulk-seq  
 161 experiments<sup>23</sup>. This suggests that DUX4 induces a network of downstream  
 162 transcription factors that in turn induces a cascade of secondary transcriptional events,  
 163 ultimately leading to apoptosis. Since the expression of transcription factors can be  
 164 low, many additional factors might fall under the detection limit in single-cell  
 165 sequencing data. Enrichr<sup>27,28</sup> was therefore used to analyze our datasets for the  
 166 presence of signature gene expression profiles, or “transcriptional footprints”, that are  
 167 indicative of the activity of specific transcription factors. Analysis of our DIE cell data

168 using Enrichr yielded a list of potential transcription factors that can explain the  
169 observed changes in gene expression (Table S6). Some of the identified profiles did  
170 indeed match differentially expressed transcription factors in the induced DIE cells  
171 (SOX3, NR2F2, ZNF217 and OTX2). In addition, the Enrichr algorithm detected  
172 several other transcription factor profiles of transcription factors which themselves are  
173 not found to be differentially expressed in our dataset (Table S6). A number of these  
174 “transcriptional footprints” were found in all 4 timepoints examined (LIN28, SOX5,  
175 ZIC3, JUNB, KLF10, MEIS2, MYCN, PITX, SETB1, ZEB2, ZNF503, MYB, WT1,  
176 NR2F2), suggesting that these factors are induced early after DUX4 induction and  
177 persist with continued DUX4 expression. Of particular interest is the identification of  
178 several transcription factors which are represented in both the upregulated as well as  
179 the downregulated gene set (e.g. ZIC3, JUNB, KLF10, MEIS2, MYCN and SETB1).  
180 As both upregulated and downregulated genes corresponded to the activity status of  
181 these transcription factors, it does strongly suggest their role in the DUX4-induced  
182 cytotoxic cascade, as opposed to only finding a one-sided effect.

183 In summary, we have found that the induction of DUX4 promotes changes in the  
184 transcriptional landscape of DIE cells as early as 2 hours post doxycycline  
185 administration. Many differentially expressed genes found in the early data sets  
186 maintain their differentially expressed status with continued DUX4 expression. This  
187 corroborates the notion that DUX4 initiates a clear progressive cascade of events, and  
188 does not stochastically and/or randomly affects genes and pathways. This is further  
189 corroborated by our finding that transcription factors and co-factors are  
190 overrepresented in the list of differentially expressed genes and account for  
191 approximately ~33% of the differentially upregulated genes, whereas they only  
192 comprise 11-13.5% of the human genome. This indeed suggests that DUX4 activates  
193 a coherent network of transcriptional regulators that together initiate a new cellular  
194 program that ultimately leads to cell death. Lastly the presence of transcription factors  
195 could also be deduced from the detection of their transcriptional footprint, even when  
196 the expression of the individual factors themselves were not always detected. This is  
197 a common shortcoming of single cell sequencing, where the detection of low abundant  
198 transcripts can be missed.

199 **Table 2: Summary of differentially expressed genes found in induced DIE cells**  
200 **at different induction times/states.**

| Induction state                         | 2h | 3h  | 4h  | 6h  |
|-----------------------------------------|----|-----|-----|-----|
| Upregulated genes                       | 43 | 77  | 133 | 248 |
| Downregulated genes                     | 8  | 36  | 40  | 68  |
| Differentially expressed genes<br>total | 51 | 113 | 173 | 361 |
| Transcription- and co-factors           | 12 | 28  | 44  | 81  |
| Kinases                                 | 3  | 3   | 6   | 10  |

201 ***Gene ontology***

202 To identify which biological processes are affected by the temporal changes in gene  
203 expression in the induced DIE cells, the differentially upregulated and downregulated  
204 genes were analyzed using the PANTHER (Protein Analysis Through Evolutionary  
205 Relationships) algorithm. PANTHER is an online tool that classifies proteins (and their  
206 corresponding genes) based on their family or subfamily, their molecular function, and  
207 their involvement in any biological processes and pathways, to facilitate high  
208 throughput analysis of datasets<sup>30–32</sup>. The biological processes that were identified are  
209 shown in Fig. 3A and Table S7. Gene ontology (GO) terms were assigned a general  
210 “umbrella” term. Table S7 shows the full list of GO terms.

211 As shown, DUX4-induction initially triggered the activation of an early developmental  
212 program and processes involved in the cell cycle and proliferation. Three hours after  
213 induction, genes involved in developmental processes are less prominent, with the  
214 majority of processes now being involved in cell cycle and RNA processing. At 6h of  
215 induction, the first apoptotic processes were identified. GO terms identified with the  
216 downregulated genes appeared more incoherent than the GO terms detected with the  
217 upregulated gene sets. This could be due to the nature of DUX4 being more of a  
218 transcriptional activator, rather than a repressor<sup>10</sup>. GO terms found with the  
219 downregulated gene sets might thus reflect the loss of cell identity, consistent with  
220 the idea that DUX4 initiates an early embryonic transcriptional program. Nonetheless,  
221 processes involved in programmed cell death were also found upon analyzing the

222 downregulated genes after 6h of DUX4 induction (Fig. 3B). Furthermore, at 3h post  
223 DUX4-induction, downregulated genes demonstrate changes in cellular respiration  
224 and energy production. These processes contribute to oxidative stress, a common  
225 occurrence in FSHD-affected cells that is likely involved in DUX4-induced apoptosis<sup>33-</sup>  
226 <sup>35</sup>.

227 The temporal identification of altered biological processes revealed a sequential path  
228 that is activated upon DUX4 induction. This path starts by activating developmental  
229 processes, and subsequently many other processes involved in RNA processing,  
230 protein production and regulation, cellular respiration, kinase activity, eventually  
231 leading to the induction of apoptosis.

232 **Figure 3. Gene ontology reveals DUX4-induced paths.** Gene ontology performed on gene lists of  
233 differentially **A)** upregulated and **B)** downregulated genes from the 4 induction states. Only biological  
234 processes with an FDR < 0.05, and a raw p value of < 10<sup>-3</sup> are included. Biological processes are  
235 color-coded based on their general “umbrella” term. The total number of detected biological processes  
236 is indicated in the top left corner of each diagram, with the number of biological processes per umbrella  
237 term annotated in the pie chart. See table S7 for the full list of biological processes per induction state.

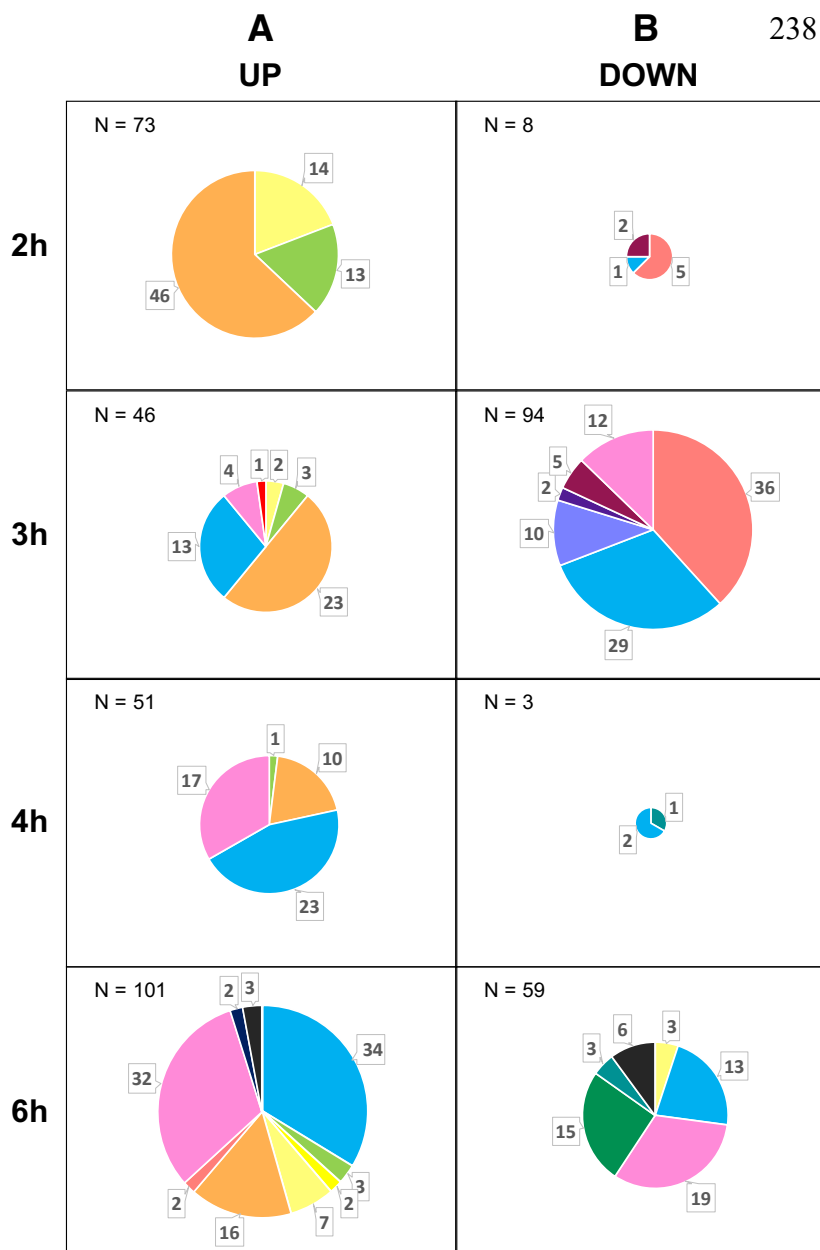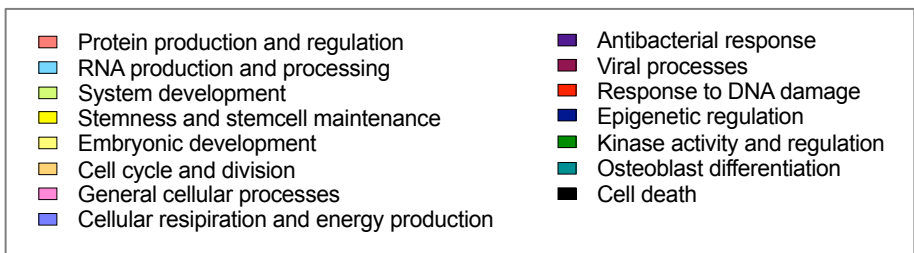

## 261 **StemID**

262 The observation that DUX4 initially activates an early embryonic transcriptional  
263 program was interesting and suggests that DUX4 temporarily converts cells toward a  
264 developmentally immature state. This notion is corroborated by StemID, an algorithm  
265 that uses transcriptome entropy to identify stem cells within a cell population<sup>36</sup>.  
266 Determining transcriptome diversity in single cells is done by using Shannon's  
267 entropy<sup>37</sup>, which measures disorder in high-dimensional systems. The entropy value  
268 of a given cell type indicates the degree of transcriptomic promiscuity. As pluripotent  
269 stem cells have the option of differentiation in any cell type, a wide number of signaling  
270 pathways need to remain active, which is reflected as high transcriptome entropy. As  
271 these cells become more committed to a specific cell fate, the number of active  
272 pathways decrease to a few specific pathways needed to maintain their cell identity,  
273 which in turn leads to a decrease in transcriptome entropy<sup>36,38,39</sup>. When a lineage  
274 trajectory is projected onto the t-SNE map, it becomes clear by the color indication of  
275 the vertices that transcriptome entropy peaks in cluster 4 (Fig. 4A). The barplot in Fig.  
276 4B clearly shows the increase in transcriptome entropy, until it peaks in cluster 4,  
277 which has an induction state of around 2h. Transcriptome entropy then slowly  
278 decreased with increasing induction times. This is thus corroborating gene ontology  
279 results that showed the induction of a more embryonic developmental state in ~2h  
280 induced DIE cells (clusters 3&4).

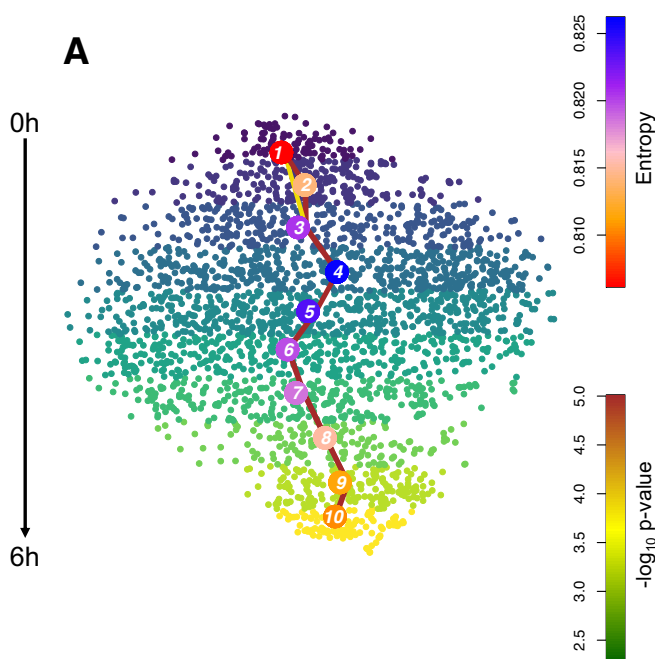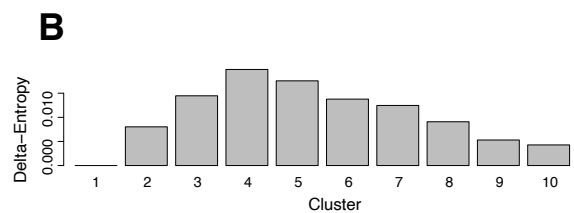

**Figure 4. StemID analysis identified a stem cell state in single cell clusters. A)** Inferred lineage tree superimposed onto the t-SNE map. The level of entropy of a cluster is indicated by the color of the vertices. The link color between vertices represents the  $-\log_{10}$  value, with only the significant links being shown ( $p < 0.01$ ). **B)** Barplot showing the delta-entropy score per cluster. The delta entropy was calculated by subtracting the lowest entropy score across all cells from the median transcriptome entropy of each cluster.

282 ***Pseudotime analysis with FateID***

283 StemID revealed a transient trajectory of stemness in induced DIE clusters, which  
284 peaked at cluster 4 and was subsequently followed by a gradual decrease of stemness  
285 at later time points, when further transcriptome changes reflect profound changes in  
286 metabolism and RNA processing. To follow up on this observation, pseudotime  
287 analysis was employed to further define temporal stages of transcriptional states,  
288 using FateID<sup>40</sup>. By doing so, we were able to identify stage-specific co-expression  
289 patterns across this vertical trajectory based on previous t-SNE clustering (Fig. 1D).  
290 Expression patterns of known DUX4 target genes show a gradual increase (LEUTX,  
291 ZSCAN4, ZNF217, and PRAMFE1), or decrease in expression (ID1 and ID3) as DUX4  
292 expression persisted (Fig. 5A), which is in line with earlier observations seen above  
293 (Fig. 1A) and previous observations in other studies<sup>9,11,22,26</sup>. These genes were  
294 present in gene nodes that showed a gradual increase or decrease in gene expression  
295 (e.g. nodes 18-21 or 1-3 respectively) (Fig. 5B). Moreover, dynamic gene expression  
296 patterns were identified in other gene nodes, such as oscillating expression patterns  
297 during the 6 hours of DUX4 induction (e.g. 4, 6, 10 and 17) (Fig. 5B and S2). This  
298 suggests the activation of a very dynamic underlying process, upon DUX4 induction,  
299 in which some genes are induced and inhibited multiple times in a relatively short time  
300 frame.

301 **Figure 5. Gene expression patterns in the induced DIE cell trajectory by FateID pseudotime**  
302 **analysis. A)** Expression patterns of 6 known DUX4 marker genes following the DIE cell induced  
303 trajectory (0h-6h induction). The nodes in which these genes are contained are annotated below the  
304 gene name in brackets. **B)** Self-organizing heatmap of z-score transformed pseudotime expression  
305 profiles across the DIE cell induced trajectory (0h-6h induction), based on the t-SNE map. Cells are  
306 represented on the x-axis, and the genes are organized in nodes that are represented on the y-axis.  
307 Genes with a similar expression pattern are clustered in nodes, with a color indication representing  
308 gene expression, based on their transformed z-score.

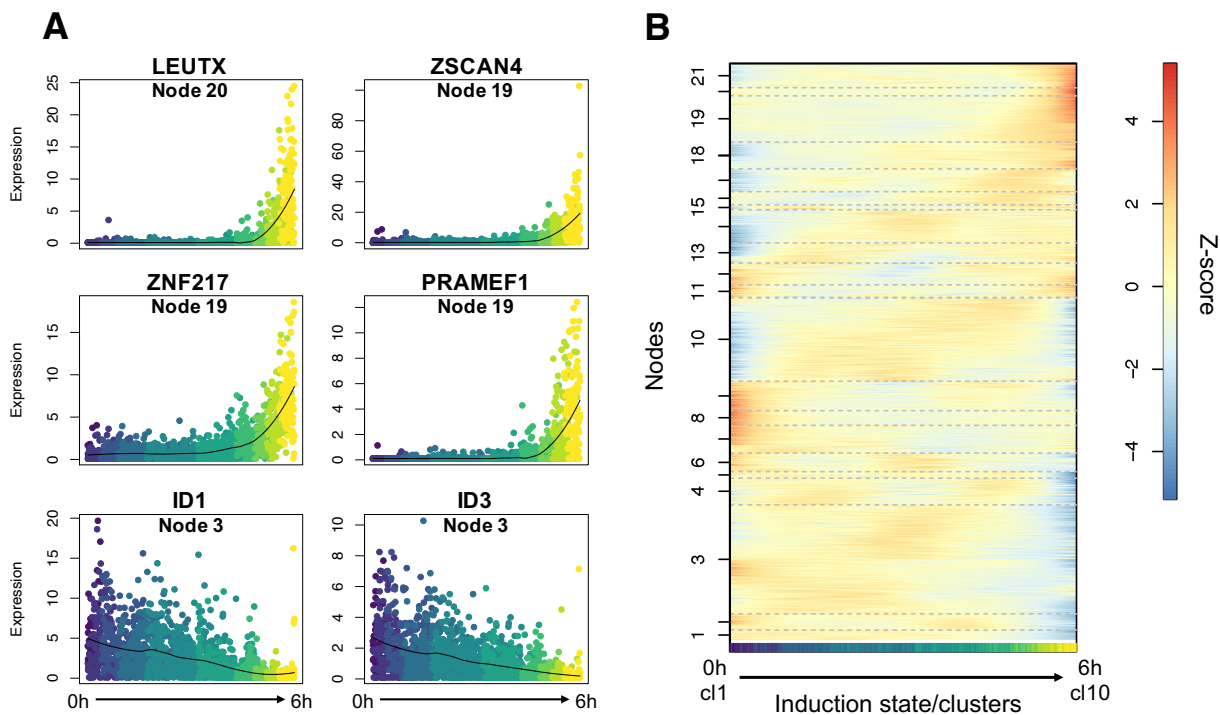

Analysis of the differentially expressed genes in the oscillating nodes did not yield a clear answer as to why these particular sets of genes vary in their expression during DUX4 induction. Of the nodes that demonstrated clear oscillating patterns (4, 6, 10, 12, 17), node 4 and 6 did not contain differentially expressed genes, node 12 contained one differentially downregulated gene (COX7A2), node 10 contained 27 differentially upregulated genes, and node 17 contained 17 differentially upregulated genes (Table 3). Using the STRING database<sup>41,42</sup>, we were able to determine that the differentially expressed genes from node 10 are primarily involved in developmental process, system development, and cell cycle and division, with many genes interconnecting and involved in all three processes. STRING is a database of known and predicted protein-protein interactions (both direct and indirect), that allowed us to visualize the types of associations between genes (Fig. 6A). The biological processes identified with STRING are similar to those identified using the PANTHER algorithm (Fig. 3A). The expression pattern in node 10 therefore fits previous GO analyses, demonstrating a temporal increase in the number of developmental genes and processes, peaking at around 2-3h (Fig. 5B and 6B). Differentially upregulated genes in node 17 did not show to be part of any significantly affected biological processes, nor a clear coherent core network could be seen between the genes as was found in node 10.



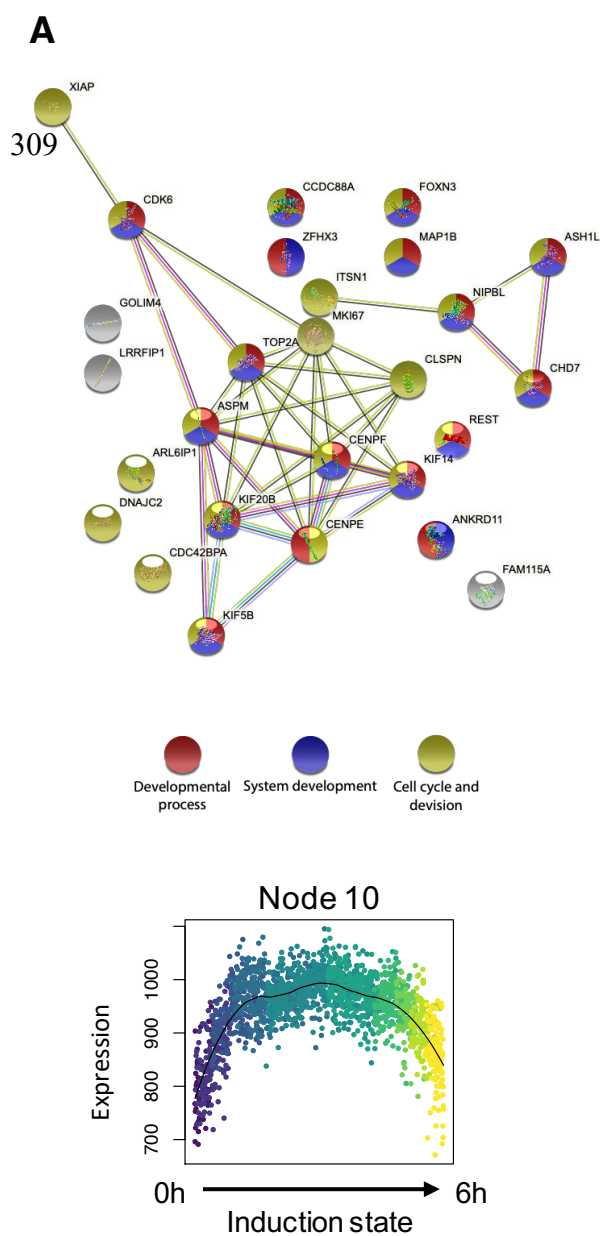

**Figure 6. Schematic representation of gene affiliations within node 10 using STRING<sup>41,42</sup>.** **A)** Affiliations between differentially upregulated genes of node 10. Genes involved in the developmental process are shown in red, in system development in blue, and in the cell cycle in yellow. Genes indicated in white are involved in other general molecular processes. The color of the links indicates the nature of the affiliation between genes. Pink and cyan represent known interactions that were experimentally determined, or from curated databases respectively. Green, red and blue interactions represent predicted interactions based on gene neighborhood, gene fusions and gene occurrence respectively. Yellow, black and purple interactions are based on text mining, co-expression, and protein homology respectively. Images were adapted from STRING-derived interaction networks. **B)** Expression pattern graph of node 10 genes, following the DIE cell induced time trajectory (0h-6h induction).

## 310 **Discussion**

311 To interrogate the temporal transcriptional changes that are induced by the  
312 transcription factor DUX4, we applied a novel cell model in which DUX4 expression  
313 can robustly be induced. Our data reveals at the single-cell level, how DUX4 induction  
314 lead to the activation of a transient early embryonic and stemness state, by activating  
315 a network of early embryonic genes, of which a disproportionately large fraction are  
316 themselves transcription factors. Our analysis suggests that DUX4 initiates a non-  
317 random consecutive chain of events that is exacerbated as time progresses. In  
318 addition, analysis of gene expression profiles using Enrichr revealed that  
319 transcriptional signatures of transcription factors, most of which were not detected  
320 during the induction periods, are already prevalent 2 hours post-induction and indeed  
321 became more profound as induction time progresses. As such, we have uncovered a  
322 larger network of transcription factors that might play a role in triggering subsequent  
323 molecular changes that ultimately contribute to DUX4 -mediated cytotoxicity.

324 Our results suggest an initial activation of developmental processes that lead cells to  
325 an increased stemness state only 2 hours after DUX4 induction. Next, additional  
326 biological processes such as RNA processing, and protein production and regulation  
327 were activated, eventually leading to the activation of apoptotic processes 6 hours  
328 post DUX4 induction.

329 The analysis performed in this study revealed which genes started diverging in their  
330 expression during the first few hours of DUX4 induction. At these early timepoints,  
331 some transcriptional changes were subtle, but as these changes in expression  
332 remained or even intensified with increased induction times, we believe them to be  
333 significant. More attention should be focused towards some of these subtle changes  
334 in expression at these early post-induction timepoints, that could normally be missed  
335 due to too stringent filtering. DUX4 itself proves that the smallest changes in  
336 expression can cause major consequences. This factor was not identified in our  
337 transcriptomic analysis, concurrent with its low transcriptional and abundance levels  
338 in muscle tissue of FSHD patients<sup>3,7,17,21</sup>. While key transcription factors, such as  
339 DUX4, are themselves not detected, they leave behind a detectable “footprint” in the  
340 transcriptome of affected cells. These elusive genes could have great implications in

341 our understanding of the role of DUX4 in early embryogenesis, as well as in the  
342 pathophysiology of FSHD.

343

## 344 **Methods**

### 345 ***Cell culturing and seeding***

346 DIE cells were cultured in growth medium consisting of IMDM basal medium with 10%  
347 Tet system-approved FBS (Clontech) and 55 $\mu$ M 2-mercaptoethanol, supplemented  
348 with 5 $\mu$ g/ml Puromycin and 6 $\mu$ g/ml Blasticidin.

### 349 ***Sample preparation and SORT-seq***

350 DIE cells were grown in 48-wells plates, until a ~90% confluency was reached. Cells  
351 were exposed to 1 $\mu$ g/ml doxycycline for 2, 3, 4, and 6 hours. Doxycycline-exposed  
352 and untreated DIE cells were rinsed with DPBS after which 0.25% Trypsin-EDTA  
353 (Thermo Scientific) was added. Trypsin was immediately removed after it had covered  
354 the complete surface. Cell were incubated for 1 minute at 5% CO<sub>2</sub> and 37°C, after  
355 which the trypsin was deactivated by adding IMDM media supplemented with 10%  
356 Tet-system approved FBS and DAPI nuclear stain. Trypsinized DIE cells were  
357 resuspended in the media and then strained using Cell-strainer capped tubes  
358 (Falcon). Cells were stored on ice until FACS sorting. Viable DAPI negative cells were  
359 sorted into 384 hard shell plates (Biorad) with 5  $\mu$ l of vapor-lock (QIAGEN) containing  
360 100-200 nl RT primers, dNTPs, and synthetic mRNA Spike-Ins, using the FACSJazz  
361 (BD biosciences). The plates were immediately spun down and stored a -80°C. Cells  
362 were processed as described in Muraro et al.<sup>43</sup>, using the CEL-seq2-bases scRNA-  
363 seq. Samples were sequenced using Illumina Nextseq 500, 2x75 kit, high output. Two  
364 biological replicates per samples were sent for sequencing. Initial normalization and  
365 mapping were done as described by Muraro et al<sup>43</sup>.

### 366 ***Data analysis***

367 Illumina sequencing-generated paired-end reads were aligned, mapped, and  
368 normalized as previously described<sup>43</sup>. For single cell analysis, cells with a minimum of  
369 6000 transcripts were considered, and data normalization was performed by  
370 downsampling transcript counts to 6000 for all cells (Fig. S1). Initial analysis revealed  
371 a batch affect between the two uninduced biological replicates. One sample showed

372 signs of additional metabolic stress. The top 187 diverging genes ( $p_{adj} < 10^{-7}$ )  
373 between the two uninduced biological replicates were removed from all data to  
374 account for any source of metabolic stress. Dimensionality reduction of cells was done  
375 using RaceID<sup>25</sup>, after which the clusters were manually determined by dividing the y-  
376 axis of the tSNE map in 10 clusters of equal size. Differential expression of genes  
377 between cell clusters were identified as described by Muraro et al<sup>43</sup>, based on a  
378 previous publication of Anders and Huber<sup>44</sup>. Pseudotime analysis was performed  
379 using StemID<sup>36</sup> and FateID<sup>40</sup>.

### 380 **Data Resources**

381 The RNA sequencing datasets are available from the GEO data base, accession  
382 number: GSE156154.

### 383 **Acknowledgements**

384 This study was supported by Stichting FSHD and the SingelSwim Utrecht.

## **References**

- 385 1. Deenen, J. C. W. *et al.* Population-based incidence and prevalence of  
386 facioscapulohumeral dystrophy. *Neurology* **83**, 1056–1059 (2014).
- 387 2. Kowaljow, V. *et al.* The DUX4 gene at the FSHD1A locus encodes a pro-  
388 apoptotic protein. *Neuromuscul. Disord.* **17**, 611–623 (2007).
- 389 3. Dixit, M. *et al.* DUX4, a candidate gene of facioscapulohumeral muscular  
390 dystrophy, encodes a transcriptional activator of PITX1. *Proc. Natl. Acad. Sci.*  
391 *U. S. A.* **104**, 18157–18162 (2007).
- 392 4. Snider, L. *et al.* RNA transcripts, miRNA-sized fragments and proteins  
393 produced from D4Z4 units: New candidates for the pathophysiology of  
394 facioscapulohumeral dystrophy. *Hum. Mol. Genet.* **18**, 2414–2430 (2009).
- 395 5. Whiddon, J. L., Langford, A. T., Wong, C. J., Zhong, J. W. & Tapscott, S. J.  
396 Conservation and innovation in the DUX4-family gene network. *Nat. Genet.* **49**,  
397 935–940 (2017).
- 398 6. Hendrickson, P. G. *et al.* Conserved roles of mouse DUX and human DUX4 in

- 399 activating cleavage-stage genes and MERVL/HERVL retrotransposons. *Nat.*  
400 *Genet.* **49**, 925–934 (2017).
- 401 7. Snider, L. *et al.* Facioscapulohumeral dystrophy: Incomplete suppression of a  
402 retrotransposed gene. *PLoS Genet.* **6**, 1–14 (2010).
- 403 8. Das, S. & Chadwick, B. P. Influence of repressive histone and DNA  
404 methylation upon D4Z4 transcription in non-myogenic cells. *PLoS One* **11**, 1–  
405 26 (2016).
- 406 9. Geng, L. N. *et al.* DUX4 Activates Germline Genes, Retroelements, and  
407 Immune Mediators: Implications for Facioscapulohumeral Dystrophy. *Dev. Cell*  
408 **22**, 38–51 (2012).
- 409 10. Knopp, P. *et al.* DUX4 induces a transcriptome more characteristic of a less-  
410 differentiated cell state and inhibits myogenesis. *J. Cell Sci.* **129**, 3816–3831  
411 (2016).
- 412 11. Rickard, A. M., Petek, L. M. & Miller, D. G. Endogenous DUX4 expression in  
413 FSHD myotubes is sufficient to cause cell death and disrupts RNA splicing and  
414 cell migration pathways. *Hum. Mol. Genet.* **24**, 5901–5914 (2015).
- 415 12. Jagannathan, S., Ogata, Y., Gafken, P. R., Tapscott, S. J. & Bradley, R. K.  
416 Quantitative proteomics reveals key roles for post-transcriptional gene  
417 regulation in the molecular pathology of facioscapulohumeral muscular  
418 dystrophy. *Elife* **8**, 1–16 (2019).
- 419 13. Homma, S., Beermann, M. Lou, Boyce, F. M. & Miller, J. B. Expression of  
420 FSHD-related DUX4-FL alters proteostasis and induces TDP-43 aggregation.  
421 *Ann. Clin. Transl. Neurol.* **2**, 151–166 (2015).
- 422 14. Winokur, S. T. *et al.* Facioscapulohumeral muscular dystrophy (FSHD)  
423 myoblasts demonstrate increased susceptibility to oxidative stress.  
424 *Neuromuscul. Disord.* **13**, 322–333 (2003).
- 425 15. Bosnakovski, D. *et al.* Transcriptional and cytopathological hallmarks of FSHD  
426 in chronic DUX4-expressing mice. *J. Clin. Invest.* **130**, 2465–2477 (2020).
- 427 16. Bosnakovski, D. *et al.* Muscle pathology from stochastic low level DUX4  
428 expression in an FSHD mouse model. *Nat. Commun.* **8**, 1–9 (2017).
- 429 17. Tassin, A. *et al.* DUX4 expression in FSHD muscle cells: How could such a  
430 rare protein cause a myopathy? *J. Cell. Mol. Med.* **17**, 76–89 (2013).

- 431 18. Clapp, J. *et al.* Evolutionary conservation of a coding function for D4Z4, the  
432 tandem DNA repeat mutated in facioscapulohumeral muscular dystrophy. *Am.*  
433 *J. Hum. Genet.* **81**, 264–279 (2007).
- 434 19. Leidenroth, A. *et al.* Evolution of DUX gene macrosatellites in placental  
435 mammals. *Chromosoma* **121**, 489–497 (2012).
- 436 20. Van der Maarel, S. M., Tawil, R. & Tapscott, S. J. Facioscapulohumeral  
437 muscular dystrophy and DUX4: Breaking the silence. *Trends Mol. Med.* **17**,  
438 252–258 (2011).
- 439 21. Jones, T. I. *et al.* Facioscapulohumeral muscular dystrophy family studies of  
440 DUX4 expression: Evidence for disease modifiers and a quantitative model of  
441 pathogenesis. *Hum. Mol. Genet.* **21**, 4419–4430 (2012).
- 442 22. Van Den Heuvel, A. *et al.* Single-cell RNA sequencing in facioscapulohumeral  
443 muscular dystrophy disease etiology and development. *Hum. Mol. Genet.* **28**,  
444 1064–1075 (2019).
- 445 23. Ashoti, A. *et al.* A genome-wide CRISPR/Cas phenotypic screen for  
446 modulators of DUX4 cytotoxicity reveals screen complications. *bioRxiv*  
447 2020.07.27.223420 (2020) doi:10.1101/2020.07.27.223420.
- 448 24. van der Maaten, L. & Hinton, G. H. Visualizing Data using t-SNE. *J. Mach.*  
449 *Learn. Res.* **9**, 2579–2605 (2008).
- 450 25. Grün, D. *et al.* Single-cell messenger RNA sequencing reveals rare intestinal  
451 cell types. *Nature* **525**, 251–255 (2015).
- 452 26. Jagannathan, S. *et al.* Model systems of DUX4 expression recapitulate the  
453 transcriptional profile of FSHD cells. *Hum. Mol. Genet.* **25**, ddw271 (2016).
- 454 27. Chen, E. Y. *et al.* Enrichr: Interactive and collaborative HTML5 gene list  
455 enrichment analysis tool. *BMC Bioinformatics* **14**, (2013).
- 456 28. Kuleshov, M. V. *et al.* Enrichr: a comprehensive gene set enrichment analysis  
457 web server 2016 update. *Nucleic Acids Res.* **44**, W90–W97 (2016).
- 458 29. Choi, S. H. *et al.* DUX4 recruits p300/CBP through its C-terminus and induces  
459 global H3K27 acetylation changes. *Nucleic Acids Res.* **44**, 5161–5173 (2016).
- 460 30. Ashburner, M. *et al.* Gene Ontology: tool for the unification of biology. *Nat.*  
461 *Genet.* **25**, 25–29 (2000).
- 462 31. Carbon, S. *et al.* The Gene Ontology Resource: 20 years and still GOing

- 463 strong. *Nucleic Acids Res.* **47**, D330–D338 (2019).
- 464 32. Mi, H., Muruganujan, A., Ebert, D., Huang, X. & Thomas, P. D. PANTHER  
465 version 14: More genomes, a new PANTHER GO-slim and improvements in  
466 enrichment analysis tools. *Nucleic Acids Res.* **47**, D419–D426 (2019).
- 467 33. Tsumagari, K. *et al.* Gene expression during normal and FSHD myogenesis.  
468 *BMC Med. Genomics* **4**, (2011).
- 469 34. Banerji, C. R. S. *et al.*  $\beta$ -catenin is central to DUX4-driven network rewiring in  
470 facioscapulohumeral muscular dystrophy. *J. R. Soc. Interface* **12**, (2015).
- 471 35. Lek, A. *et al.* Applying genome-wide CRISPR-Cas9 screens for therapeutic  
472 discovery in facioscapulohumeral muscular dystrophy. *Sci. Transl. Med.* **12**, 9–  
473 11 (2020).
- 474 36. Grün, D. *et al.* De Novo Prediction of Stem Cell Identity using Single-Cell  
475 Transcriptome Data. *Cell Stem Cell* **19**, 266–277 (2016).
- 476 37. Shannon, C. E. A Mathematical Theory of Communication. *Bell Syst. Tech. J.*  
477 **27**, 623–656 (1948).
- 478 38. Macarthur, B. D. & Lemischka, I. R. Statistical mechanics of pluripotency. *Cell*  
479 **154**, 484–489 (2013).
- 480 39. Banerji, C. R. S. *et al.* Cellular network entropy as the energy potential in  
481 Waddington’s differentiation landscape. *Sci. Rep.* **3**, 25–27 (2013).
- 482 40. Herman, J. S., Sagar & Grün, D. FateID infers cell fate bias in multipotent  
483 progenitors from single-cell RNA-seq data. *Nat. Methods* **15**, 379–386 (2018).
- 484 41. Snel, B., Lehmann, G., Bork, P. & Huynen, M. A. String: A web-server to  
485 retrieve and display the repeatedly occurring neighbourhood of a gene. *Nucleic*  
486 *Acids Res.* **28**, 3442–3444 (2000).
- 487 42. Szklarczyk, D. *et al.* STRING v11: Protein-protein association networks with  
488 increased coverage, supporting functional discovery in genome-wide  
489 experimental datasets. *Nucleic Acids Res.* **47**, D607–D613 (2019).
- 490 43. Muraro, M. J. *et al.* A Single-Cell Transcriptome Atlas of the Human Pancreas.  
491 *Cell Syst.* **3**, 385-394.e3 (2016).
- 492 44. Anders, S. *et al.* Differential expression analysis for sequence count data via  
493 mixtures of negative binomials. *Adv. Environ. Biol.* **7**, 2803–2809 (2010).
- 494



## Supplementary data

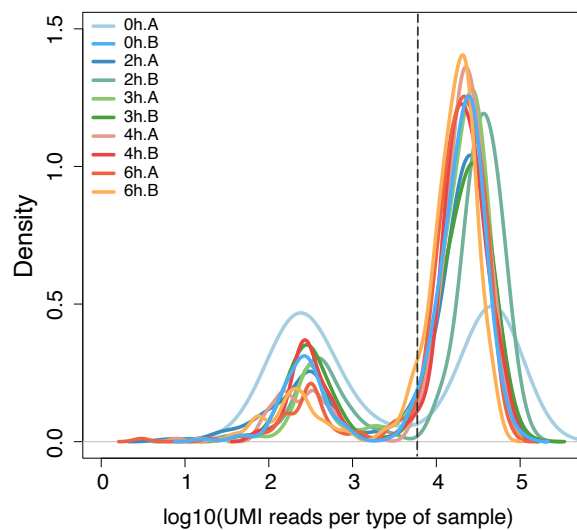

**Figure S1. Density plot representing the total read count of all samples.** Samples are color coded. An A or B annotation represents to which biological replicate the sample belongs. The intermitted line shows the cutoff of the number of UMI reads (6000) used to determine which cells to include for the analysis. All cells with a normalized transcript count above 6000 have been included in the RaceID analysis.

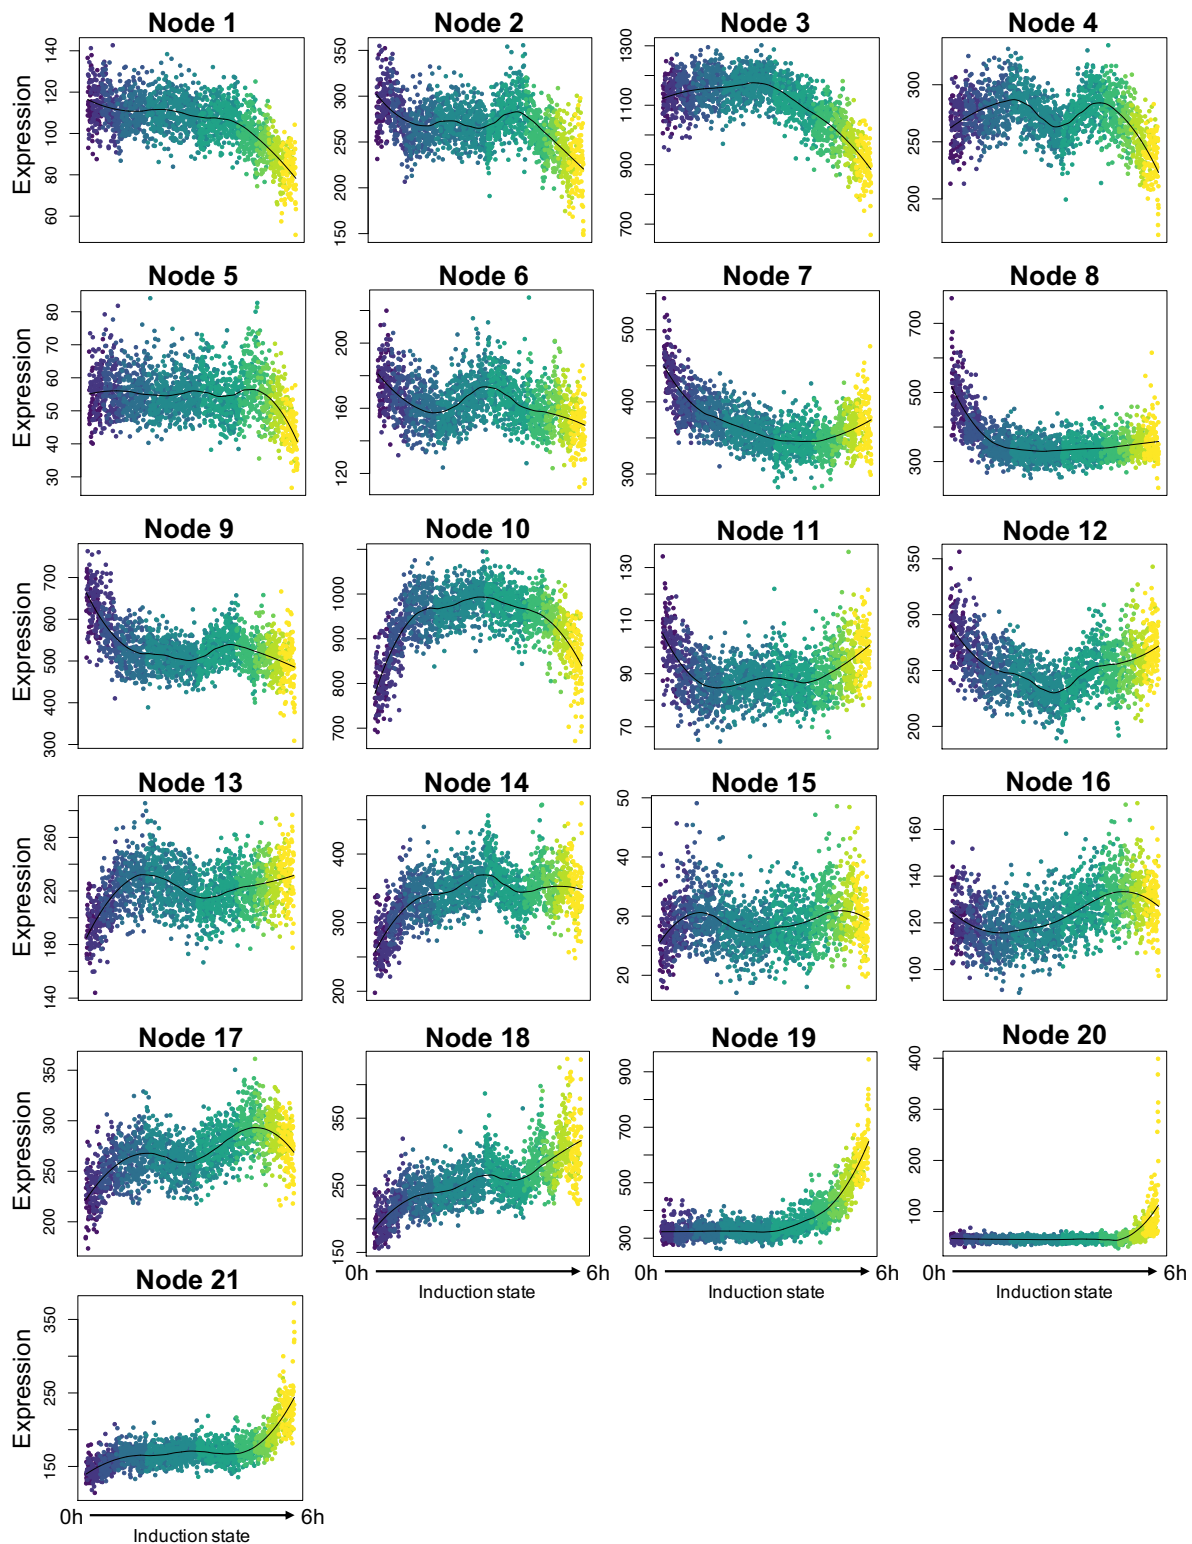

495 **Figure S2. Gene expression patterns of gene nodes from pseudotime analysis.** Dynamic gene  
496 expression patterns of all nodes of the self-organizing heat map of figure 5A. Each point represents a  
497 cell. The color of the point and its location on the x-axis represents its induction state from uninduced  
498 (0h) to 6h induced. Normalized expression is plotted on the y-axis. The black line indicates a local  
499 regression.
